# Supplementary material for: Decorin‐mediated inhibition of the migration of U87MG glioma cells involves activation of autophagy and suppression of TGF‐β signaling
Source: PubMed Central journal article supplement (PMC4932450; doi:10.1002/2211-5463.12076), 2016-05-31

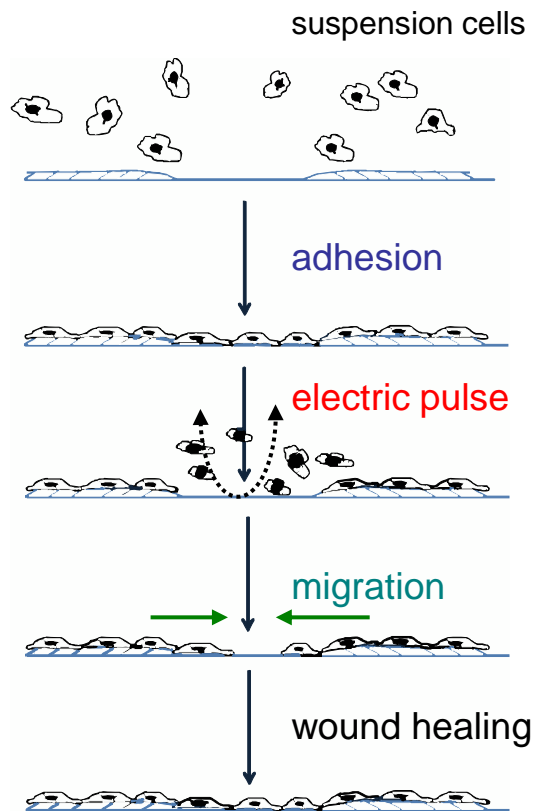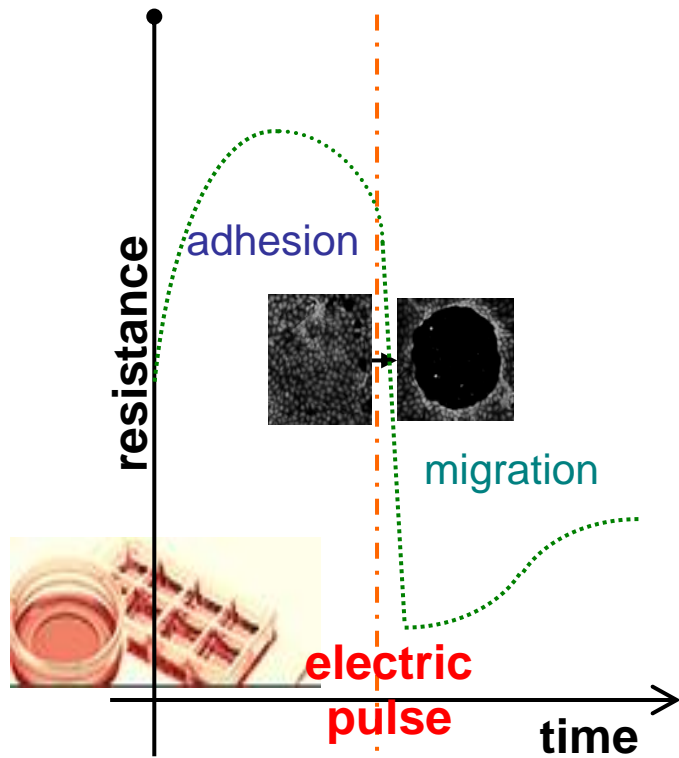

Supplement: FEB4-6-707-s001.pdf [file FEB4-6-707-s001.pdf]
